# Supplementary material
Source: PubMed Central journal article supplement (PMC137541)

Proteasome inhibition-induced activation of xbp1 processing  
indicative of ER stress

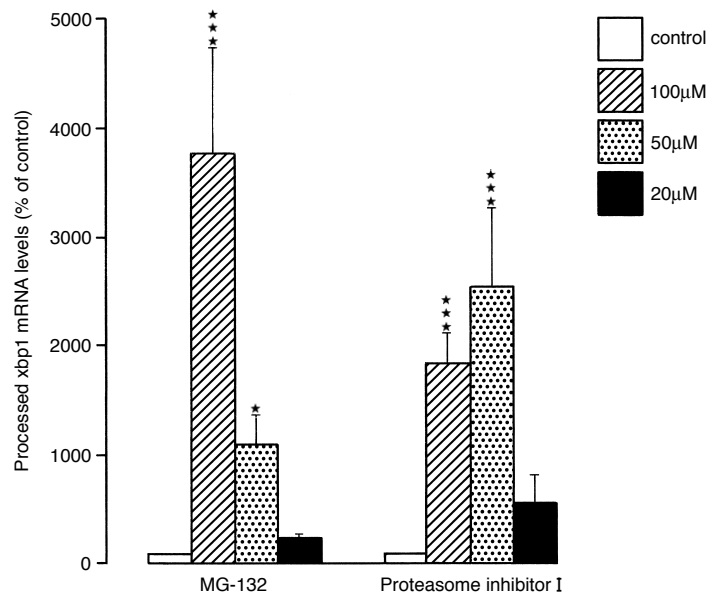

Supplement: pnas_232588799_2.pdf [file pnas_232588799_2.pdf]
